# Supplementary material for: Cardamonin inhibits colonic neoplasia through modulation of MicroRNA expression
Source: PubMed Central journal article supplement (PMC5655681; doi:10.1038/s41598-017-14253-8), 2017-10-24

**Online Supplementary Information**

**Cardamonin inhibits colonic neoplasia through modulation of MicroRNA expression**

Shirley James<sup>1\*</sup>, Jayasekharan S. Aparna<sup>1\*</sup>, Aswathy Mary Paul<sup>2\*</sup>, Manendra Babu Lankadasari<sup>1,3</sup>, Sabira Mohammed<sup>1,3</sup>, Valsalakumari S. Binu<sup>4</sup>, Thankayyan R. Santhoshkumar<sup>1</sup>, Girijadevi Reshmi<sup>2</sup>, Kuzhuvilil B. Harikumar<sup>1</sup>

**Supplementary table 1: Cardamonin inhibited the colorectal cancer formation in mice:  
Percentage of tumor incidence in each groups expressed as percentage**

| Group | Number of animals in each group | Tumor incidence | % tumor incidence |
|-------|---------------------------------|-----------------|-------------------|
| 1     | 5                               | 0/5             | 0                 |
| 2     | 8                               | 7/8             | 87.5              |
| 3     | 10                              | 8/10            | 80                |
| 4     | 10                              | 7/10            | 70                |

**Supplementary Table 2: Azoxymethane and cardamonin treatment significantly altered the microRNA profiles in colorectal cancer: Most significant miRNA between groups expressed as fold change**

|           |                  | G1 vs G2    | G2 vs G3    | G2 vs G4    |
|-----------|------------------|-------------|-------------|-------------|
|           | miRNA            | Fold change | Fold change | Fold change |
| <b>a*</b> | mmu-miR-6922-5p  | -1.72       | 1.17        | 1.16        |
|           | mmu-miR-6907-5p  | -1.49       | 1.43        | 1.13        |
|           | mmu-miR-3113-5p  | -1.40       | 1.27        | 1.60        |
|           | mmu-mir-494      | -1.05       | 1.82        | 1.40        |
|           | mmu-mir-3068     | -0.83       | 1.64        | 1.75        |
|           | mmu-miR-690      | -0.78       | 1.43        | 0.72        |
|           | mmu-mir-145a     | -0.61       | 1.16        | 0.68        |
|           | mmu-miR-30b-3p   | -0.49       | 1.17        | 0.90        |
| <b>b*</b> | mmu-mir-682      | -0.83       | 0.42        | -0.34       |
|           | mmu-miR-485-3p   | -1.01       | -0.86       | -0.91       |
|           | mmu-miR-299b-5p  | -0.93       | -0.80       | -0.61       |
|           | mmu-miR-129-1-3p | -0.63       | -0.99       | -0.99       |
|           | mmu-miR-434-3p   | -0.62       | -0.92       | -0.84       |
|           | mmu-mir-485      | -0.52       | -0.86       | -0.91       |
|           | mmu-miR-6939-5p  | -0.52       | -0.61       | -0.58       |
|           | mmu-miR-6369     | -0.47       | -0.79       | -1.02       |
|           | mmu-miR-5100     | 0.49        | -0.67       | -0.35       |

|           |                 |      |       |       |
|-----------|-----------------|------|-------|-------|
| <b>c*</b> | mmu-miR-7066-3p | 0.56 | -1.13 | -0.61 |
|           | mmu-let-7d-3p   | 1.09 | -2.40 | -2.01 |

a\*: miRNAs downregulated in AOM alone groups (group 2) and expression levels were increased after cardamonin treatment (group 3 & 4).

b\*: There was no statistically significant difference between the groups.

c\*: miRNAs upregulated in AOM alone groups (group 2) and expression levels were decreased after cardamonin treatment (group 3 & 4).

**Supplementary table 3: Predicted target genes for each miRNA**

| miRNA            | miRDB | TargetScan | microT-CDS | miRTarBase | PolymiRTS |
|------------------|-------|------------|------------|------------|-----------|
| mmu-miR-6922-5p  | 369   | 923        | 209        | 0          | 168       |
| mmu-miR-6907-5p  | 587   | 1383       | 418        | 0          | 237       |
| mmu-miR-3113-5p  | 408   | 3875       | 176        | 27         | 200       |
| mmu-mir-494      |       |            |            |            |           |
| mmu-miR-494-3p   | 407   | 355        | 473        | 39         | 265       |
| mmu-miR-494-5p   | 234   | 650        | 55         | 0          | 103       |
| mmu-mir-3068     |       |            |            |            |           |
| mmu-miR-3068-3p  | 407   | 2366       | 64         | 0          | 123       |
| mmu-miR-3068-5p  | 169   | 2395       | 197        | 10         | 134       |
| mmu-miR-690      | 220   | 2667       | 148        | 27         | 205       |
| mmu-mir-145a     |       |            |            |            |           |
| mmu-mir-145a-3p  | 511   | 4409       | 388        | 0          | 272       |
| mmu-mir-145a-5p  | 441   | 621        | 328        | 36         | 179       |
| mmu-miR-30b-3p   | 252   | 2649       | 112        | 0          | 166       |
| mmu-mir-682      | 233   | 221        | 193        | 11         | 123       |
| mmu-miR-485-3p   | 100   | 2421       | 72         | 0          | 86        |
| mmu-miR-299b-5p  | 99    | 2155       | 44         | 0          | 89        |
| mmu-miR-129-1-3p | 285   | 414        | 136        | 154        | 153       |
| mmu-miR-434-3p   | 123   | 2088       | 253        | 37         | 95        |
| mmu-mir-485      |       |            |            |            |           |
| mmu-miR-485-5p   | 555   | 72         | 161        | 5          | 197       |
| mmu-miR-6939-5p  | 711   | 3838       | 433        | 0          | 194       |
| mmu-miR-6369     | 585   | 530        | 442        | 0          | 194       |
| mmu-miR-5100     | 13    | 366        | 5          | 1          | 23        |
| mmu-miR-7066-3p  | 145   | 2103       | 105        | 0          | 102       |
| mmu-let-7d-3p    | 14    | 312        | 12         | 0          | 35        |

**Supplementary table 4: minimum free energy (MFE) calculated for miRNA-target interaction using the RNAhybrid web service**

|                        |                                                                          | <b>HYBRIDS</b> |
|------------------------|--------------------------------------------------------------------------|----------------|
| <b>CBX2</b>            | 5' G A UG AUAU UG C 3'<br>CC CUCU GGUCCC UCCC A<br>GG GAGA UCAGGG AGGG U | -35.1          |
| <b>mmu-miR-6922-5p</b> | 3' A UG G UG 5'                                                          |                |
| <b>TNFSF13</b>         | 5' U CC CUU G U 3'<br>CCUC UUUGC UCCC CUCCCAC<br>GGAG AGAUG AGGG GAGGGUG | -32.8          |
| <b>mmu-miR-6922-5p</b> | 3' UC U 5'                                                               |                |
| <b>CYP2C55</b>         | 5' C G U 3'<br>AGG AGCA GUC<br>UCC UCGU CAG                              | -18.8          |
| <b>mmu-let-7d-3p</b>   | 3' UCUU G C CAUAUC 5'                                                    |                |
| <b>ZIC1</b>            | 5' U A GG GAAG A 3'<br>GAAGGGCGG AGG GUG AG<br>CUUUCGUC UCC CAU UC       | -26.4          |
| <b>mmu-let-7d-3p</b>   | 3' U G AG A 5'                                                           |                |
| <b>MEX3C</b>           | 5' G UUGU U C 3'<br>AGA AG CAGUGGGUC<br>UCU UC GUCGUCCAG                 | -21.3          |
| <b>mmu-let-7d-3p</b>   | 3' U C CAUAUC 5'                                                         |                |
| <b>PHEX</b>            | 5' G A G 3'<br>CUG GGAGG GGGCAA<br>GAC CCUCC UCCGUU                      | -25.6          |
| <b>mmu-miR-7066-3p</b> | 3' G ACCCAUCU 5'                                                         |                |
| <b>RNF20</b>           | 5' U CACUG AA AAU G 3'<br>UGGG AG GGG GUGGGUAGA<br>ACCC UC UCC UACCCAUCU | -30.6          |
| <b>mmu-miR-7066-3p</b> | 3' G CG GU 5'                                                            |                |
| <b>SEC61A2</b>         | 5' G GU U 3'<br>CAUCA ACCAGCUGCCU<br>GUGGU UGGUCGACGGA                   | -32.3          |
| <b>mmu-miR-6939-5p</b> | 3' GAAG C 5'                                                             |                |
| <b>SLC4A8</b>          | 5' A CAG G C 3'<br>CCACCA U AGCUGCCU<br>GGUGGU G UCGACGGA                | -30.2          |
| <b>mmu-miR-6939-5p</b> | 3' GAA U G C 5'                                                          |                |
| <b>SIRT2</b>           | 5' A AACUCA A 3'<br>GGGUC CCC UCCCAGAA<br>CUCGG GGG AGGGUCUU             | -28.7          |
| <b>mmu-miR-6907-5p</b> | 3' G A ACAC 5'                                                           |                |
| <b>XXYLT1</b>          | 5' A CUUA CCUCUA C 3'<br>GAGCU UCCCU UCCCAGAA<br>CUCGG AGGGA AGGGUCUU    | -31.7          |
| <b>mmu-miR-6907-5p</b> | 3' G CAC 5'                                                              |                |

**Supplementary Table 5: miRNA and the respective targets with their roles in colon cancer.**

| S.No. | miRNA           | Target Gene | Reference |
|-------|-----------------|-------------|-----------|
| 1     | mmu-miR-6939-5p | Slc4a8      | 1         |
| 2     | mmu-miR-7066-3p | RNF20       | 2         |
| 3     | mmu-let-7d-3p   | MEX3c       | 3         |
| 4     | mmu-let-7d-3p   | CYP2C55     | 4         |

1. Leviel, Françoise, et al. "The Na<sup>+</sup>-dependent chloride-bicarbonate exchanger SLC4A8 mediates an electroneutral Na<sup>+</sup> reabsorption process in the renal cortical collecting ducts of mice." *The Journal of clinical investigation* 120.5 (2010): 1627-1635.
2. Chernikova, Sophia B., et al. "Deficiency in mammalian histone H2B ubiquitin ligase Bre1 (Rnf20/Rnf40) leads to replication stress and chromosomal instability." *Cancer research* 72.8 (2012): 2111-2119.
3. Burrell, Rebecca A., et al. "Replication stress links structural and numerical cancer chromosomal instability." *Nature* 494.7438 (2013): 492-496.
4. De Robertis, Mariangela, et al. "The AOM/DSS murine model for the study of colon carcinogenesis: From pathways to diagnosis and therapy studies." *Journal of carcinogenesis* 10.1 (2011): 9.

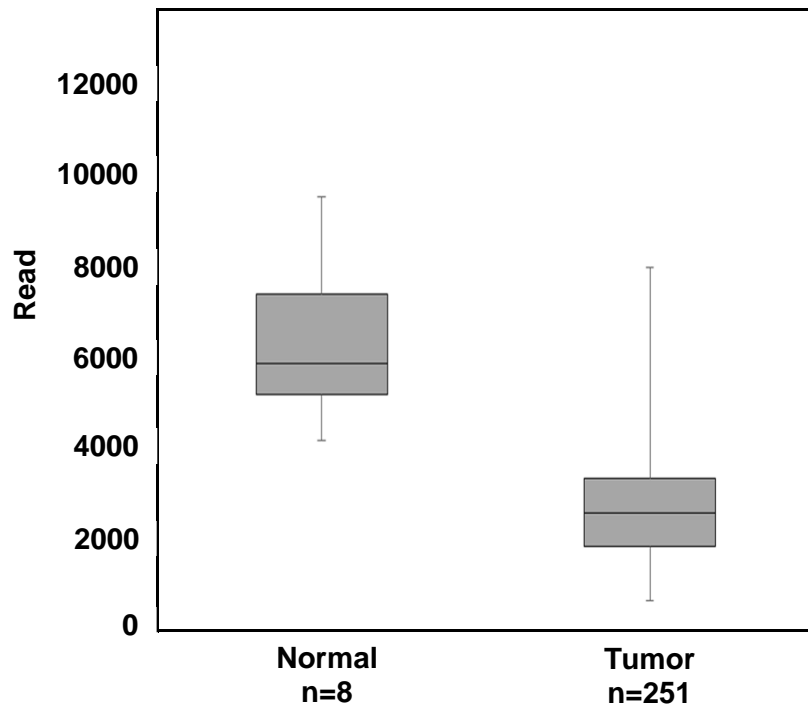

**Supplementary figure 1:** Expression of hsa-miR-let7d in human CRC samples. Data is expressed as average read count in CRC samples in relative to that of normal samples.



### Original blots for figure 1f

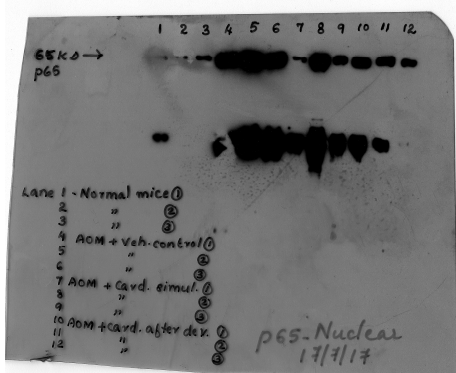

### Supplementary figure 2

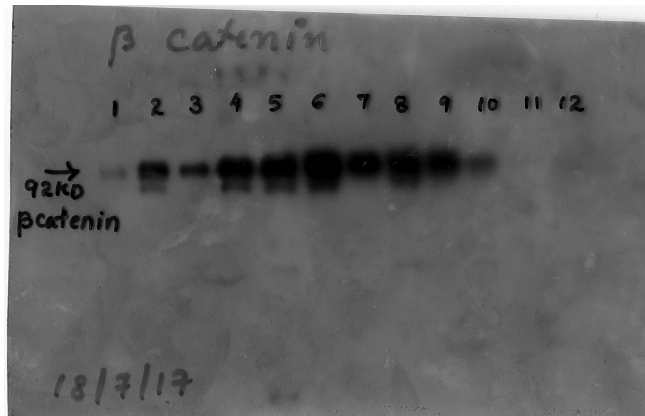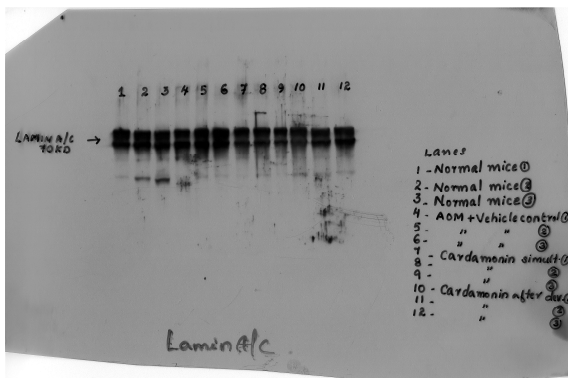

### Original blots for figure 8c

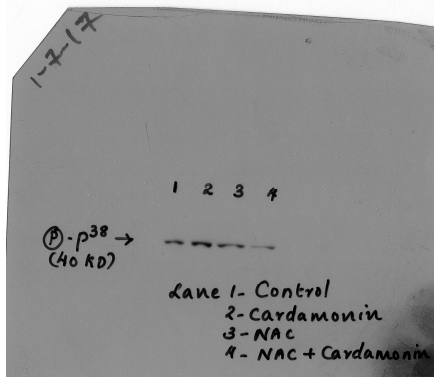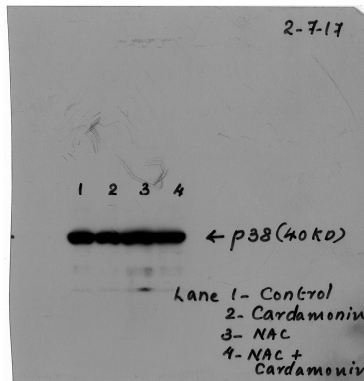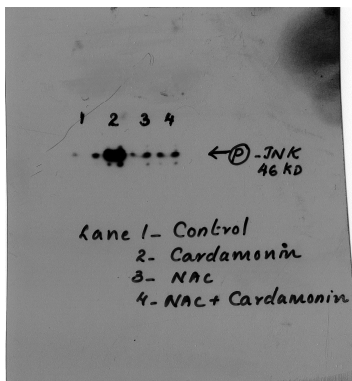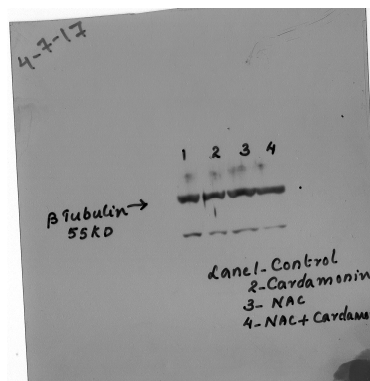

Supplement: 41598_2017_14253_MOESM1_ESM.pdf [file 41598_2017_14253_MOESM1_ESM.pdf]
